# Supplementary material for: On the Evolutionary History of Philometridae (Nematoda: Dracunculoidea): Integrative Taxonomy Reveals Evidence of Character Diversification and Host–Parasite Cophylogenetic Patterns
Source: MDPI journal article supplement (doi:10.3390/d15060763), 2023-06-10
Supplement: s1 [file s1]

## Supplement

**Supplement S1.** Polymerase chain reaction (PCR) conditions and primers used to amplify the domains D2 and D3 of the nuclear 28S rRNA gene in the present study.

Primers (also used for sequencing): D2A (5'-ACAAGT ACC GTG AGG GAA AGT-3') forward + D3B (5'-TGC GAA GGA ACC AGC TAC TA-3') reverse

PCR reactions (25 µl total volume) consisted of: 2.5 µl of 10× PCR buffer minus MgCl<sub>2</sub>, 1.5 µl of MgCl<sub>2</sub> (50mM), 2 µl of dNTPs (2.5mM), 0.25 µl of each primer (10mM), 0.2 µl of Platinum Taq DNA polymerase (5 U/µl) (Invitrogen), 0.25 µl of BSA (10 mg / mL), 16.0 µl of water and 2.0 µl of genomic DNA

PCR cycling conditions: denaturation at 94°C for 5 min, followed by 35 cycles of 94°C for 1 min, annealing at 50°C for 1min and elongation at 72°C for 1 min, followed by a post-amplification extension step at 72°C for 5 min

Note: Attempts to amplify the 18S rRNA failed probably due to DNA fragmentation, since samples were fixed in formalin and genetic markers were to amplify a long fragment ( $\approx$  1,800bp).

**Supplement S2.** Details on the definition of morphological / life history characters and states used in the present study.

Morphological and life history traits matrix of all representatives used in the present study (see as follows the details on characters and their respective states).

| Species                             | Cuticle surface | Cephalic outgrowth | Number of outer circle cephalic papillae | Number of inner circle cephalic papillae | Peribuccal ring of teeth | Esophageal teeth | Esophagus structure | Esophageal gland | Ventriculus | Vulva | Protusions on female tail | Structure of gubernaculum distal end | Relative size of spicules | Pair of far anterior precloacal papillae | Structure of male tail | Site of infection of gravid females | Habitat | Host Order | Geographic Origin | References |
|-------------------------------------|-----------------|--------------------|------------------------------------------|------------------------------------------|--------------------------|------------------|---------------------|------------------|-------------|-------|---------------------------|--------------------------------------|---------------------------|------------------------------------------|------------------------|-------------------------------------|---------|------------|-------------------|------------|
| <i>Afrophilometra hydrocyoni</i>    | 1               | 0                  | 0                                        | 2                                        | 0                        | 0                | 1                   | 1                | 1           | 0     | 1                         | ?                                    | ?                         | ?                                        | ?                      | 0                                   | 1       | 3          | 2                 | [1]        |
| <i>Alinema amazonicum</i>           | 0               | 0                  | 0                                        | 2                                        | 1                        | 0                | 1                   | 2                | 1           | 1     | 2                         | 2                                    | 1                         | 1                                        | 0                      | 1                                   | 1       | 1          | 0                 | [2, 3]     |
| <i>Caranginema americanum</i>       | 1               | 0                  | 0                                        | 1                                        | 0                        | 1                | 2                   | 1                | 1           | 0     | 1                         | 1                                    | 0                         | 0                                        | 1                      | 2                                   | 0       | H          | 8                 | [4, 5]     |
| <i>Digitiphilometroides marinus</i> | 1               | 0                  | 0                                        | 2                                        | 0                        | 0                | 1                   | 1                | 1           | 0     | 1                         | ?                                    | ?                         | ?                                        | ?                      | 1                                   | 0       | H          | 4                 | [6, 7]     |
| <i>Nilonema senticosum</i>          | 1               | 0                  | 0                                        | 0                                        | 0                        | 0                | 0                   | 1                | 0           | 0     | 0                         | ?                                    | ?                         | ?                                        | ?                      | 1&4                                 | 1       | 5          | 0                 | [3, 8]     |
| <i>Philometra arafurensis</i>       | 0               | 0                  | 0                                        | 2                                        | 0                        | 0                | 1                   | 1                | 1           | 0     | 1                         | 4&6                                  | 0                         | 0                                        | 2                      | 3                                   | 0       | B          | 4                 | [7]        |
| <i>Philometra bagri</i>             | 0               | 0                  | 1                                        | 2                                        | 0                        | 0                | 1                   | 1                | 1           | 0     | 1                         | ?                                    | ?                         | ?                                        | ?                      | 2&5                                 | 1       | 1          | 2                 | [1, 9]     |
| <i>Philometra brevispicula</i>      | 0               | 0                  | 0                                        | 2                                        | 0                        | 0                | 1                   | 1                | 1           | ?     | 1                         | 1                                    | 0                         | 0                                        | 1                      | 5                                   | 0       | B          | 5                 | [10]       |
| <i>Philometra cyprinirutili</i>     | 0               | 0                  | 0                                        | 2                                        | 0                        | 0                | 1                   | 1                | ?           | 0     | 1                         | 2                                    | 1                         | 0                                        | 1                      | 1                                   | 1       | 0          | 1                 | [11–14]    |
| <i>Philometra diplectri</i>         | 0               | 0                  | 0                                        | 2                                        | 0                        | 0                | 1                   | 1                | 1           | 0     | 0                         | 1                                    | 0                         | 0                                        | 1                      | 5                                   | 0       | E          | 8                 | [15]       |
| <i>Philometra floridensis</i>       | 0               | 0                  | 0                                        | 2                                        | 0                        | 0                | 1                   | 1                | 1           | 0     | 0                         | 2                                    | 1                         | 0                                        | 2                      | 3                                   | 0       | B          | 8                 | [16]       |
| <i>Philometra globiceps</i>         | 0               | 0                  | 1                                        | 2                                        | 0                        | 0                | 1                   | 1                | 1           | 0     | 0                         | 4&6                                  | 0                         | 0                                        | 2                      | 3                                   | 0       | E          | 5                 | [17]       |
| <i>Philometra gracilis</i>          | 0               | 0                  | 0                                        | 2                                        | 0                        | 0                | 1                   | 1                | 1           | 0     | 1                         | ?                                    | ?                         | ?                                        | ?                      | 5                                   | 0       | B          | 4                 | [18]       |
| <i>Philometra gymnosardae</i>       | 0               | 0                  | 0                                        | 1                                        | 0                        | 0                | 1                   | 1                | 1           | 0     | 1                         | ?                                    | 1                         | 0                                        | 3                      | 1                                   | 0       | A          | 4                 | [19]       |
| <i>Philometra iraqiensis</i>        | 0               | 0                  | 0                                        | 2                                        | 0                        | 0                | 1                   | 1                | 1           | 0     | 1                         | ?                                    | ?                         | ?                                        | ?                      | 1&3                                 | 0       | 7          | 4                 | [20]       |
| <i>Philometra kotlani</i>           | 0               | 0                  | 0                                        | 2                                        | 0                        | 0                | 1                   | 1                | ?           | ?     | 1                         | 2                                    | 0                         | 0                                        | 2                      | 1                                   | 1       | 0          | 1                 | [21–27]    |
| <i>Philometra lagocephali</i>       | 0               | 0                  | 0                                        | 2                                        | 0                        | 0                | 1                   | 1                | 1           | 0     | 0                         | ?                                    | ?                         | ?                                        | ?                      | 1                                   | 0       | 4          | 4                 | [28, 29]   |
| <i>Philometra lateolabracis</i>     | 0               | 0                  | 0                                        | 2                                        | 0                        | 0                | 1                   | 1                | 1           | 0     | 1                         | 4&6                                  | 0                         | 0                                        | 3                      | 3                                   | 0       | C          | 6                 | [1,30]     |
| <i>Philometra latii</i>             | 0               | 0                  | 0                                        | 2                                        | 0                        | 1                | 1                   | 1                | 1           | 0     | 0                         | ?                                    | ?                         | ?                                        | ?                      | 1                                   | 1       | D          | 2                 | [1]        |
| <i>Philometra longa</i>             | 0               | 0                  | 0                                        | 2                                        | 0                        | 0                | 1                   | 1                | 1           | 0     | 0                         | 3&4                                  | 0                         | 0                                        | 2                      | 1                                   | 0       | 8          | 7                 | [31]       |
| <i>Philometra madai</i>             | 0               | 0                  | 0                                        | 1                                        | 0                        | 0                | 1                   | 1                | 1           | 0     | 0                         | 4                                    | 1                         | 0                                        | 3                      | 3                                   | 0       | B          | 6                 | [30, 32]   |
| <i>Philometra morii</i>             | 1               | 0                  | 0                                        | 2                                        | 0                        | 1                | 1                   | 1                | 1           | 0     | 1                         | 2                                    | 1                         | 0                                        | 1                      | 2&5                                 | 0       | E          | 5                 | [33]       |
| <i>Philometra nattereri</i>         | 0               | 0                  | 0                                        | 2                                        | 0                        | 0                | 2                   | 1                | 1           | 0     | 1                         | ?                                    | ?                         | ?                                        | ?                      | 5                                   | 1       | 3          | 0                 | [34]       |
| <i>Philometra nemipteri</i>         | 0               | 0                  | 0                                        | 1                                        | 0                        | 0                | 1                   | 1                | 1           | 0     | 0                         | 4                                    | 1                         | 0                                        | 3                      | 3                                   | 0       | B          | 6                 | [35]       |
| <i>Philometra obturans</i>          | 1               | 0                  | 1                                        | 1                                        | 0                        | 0                | 1                   | 1                | ?           | 0     | 1                         | 2                                    | 1                         | 0                                        | 1                      | 5&6                                 | 1       | 6          | 1                 | [36–38]    |
| <i>Philometra ocularis</i>          | 0               | 0                  | 1                                        | 1                                        | 0                        | 0                | 1                   | 1                | 1           | 0     | 1                         | ?                                    | ?                         | ?                                        | ?                      | 5                                   | 0       | E          | 4                 | [39–44]    |
| <i>Philometra ovata</i>             | 0               | 0                  | 1                                        | 2                                        | 0                        | 0                | 1                   | 1                | 1           | 0     | 1                         | 2                                    | 1                         | 0                                        | 2                      | 1                                   | 1       | 0&F&G      | 1                 | [45–47]    |
| <i>Philometra pellucida</i>         | 0               | 0                  | 0                                        | 2                                        | 0                        | 0                | 1                   | 1                | 1           | 0     | 0                         | ?                                    | ?                         | ?                                        | ?                      | 1                                   | 0       | 4          | 4                 | [48–50]    |

|                                        |   |   |   |   |   |   |   |   |   |   |   |     |   |   |   |     |   |   |   |              |
|----------------------------------------|---|---|---|---|---|---|---|---|---|---|---|-----|---|---|---|-----|---|---|---|--------------|
| <i>Philometra rara</i>                 | 0 | 0 | 1 | 2 | 0 | 0 | 1 | 1 | 1 | 0 | 1 | 4&6 | 0 | 0 | 2 | 3   | 0 | E | 4 | [51]         |
| <i>Philometra rischta</i>              | 0 | 0 | 0 | 2 | 0 | 0 | 1 | 1 | 1 | 0 | 1 | 3   | 0 | 0 | 1 | 2&5 | 1 | 0 | 1 | [12, 23, 52] |
| <i>Philometra saltatrix</i>            | 0 | 0 | 0 | 2 | 0 | 0 | 1 | 1 | 1 | 0 | 1 | 5   | 0 | 0 | 2 | 3   | 0 | A | 5 | [51, 53–55]  |
| <i>Philometra sciaenae</i>             | 0 | 0 | 0 | 2 | 0 | 0 | 1 | 1 | 1 | 0 | 0 | 4   | 0 | 0 | 3 | 3   | 0 | B | 6 | [32, 35]     |
| <i>Philometra spiriformis</i>          | 0 | 0 | 0 | 2 | 0 | 0 | 1 | 1 | 1 | 0 | 1 | ?   | ? | ? | ? | 5   | 1 | D | 2 | [1]          |
| <i>Philometroides grandipapillatus</i> | 1 | 0 | 2 | 2 | 0 | 0 | 1 | 1 | 1 | 0 | 0 | ?   | ? | ? | ? | 0&2 | 0 | H | 6 | [10]         |
| <i>Philometroides moravecí</i>         | 1 | 0 | 0 | 2 | 0 | 1 | 2 | 1 | 1 | 0 | 1 | 2   | 0 | 0 | 2 | 2&5 | 1 | G | 1 | [56, 57]     |
| <i>Philometroides sanguineus</i>       | 1 | 0 | 0 | ? | 0 | 1 | 1 | 1 | ? | 0 | 0 | 2   | 0 | ? | 2 | 0   | 1 | 0 | 1 | [58, 59]     |
| <i>Philometroides seriolae</i>         | 1 | 0 | 0 | 1 | 0 | 0 | 1 | 1 | 1 | 0 | 0 | ?   | ? | ? | ? | 7   | 0 | H | 6 | [60, 61]     |
| <i>Philometroides stomachicus</i>      | 1 | 0 | 0 | 2 | 0 | 0 | 1 | 1 | 1 | ? | 0 | ?   | ? | ? | ? | 8   | 0 | B | 4 | [18]         |
| <i>Rumai rumai</i>                     | 0 | 1 | 0 | 2 | 0 | 0 | 0 | 0 | 0 | 0 | 0 | ?   | ? | ? | ? | 5   | 1 | 5 | 0 | [8]          |
| <i>Philonema oncorhynchi</i>           | 0 | 0 | 0 | 1 | 0 | 0 | 0 | 0 | 0 | 0 | 0 | 0   | 0 | 1 | 0 | 1   | 1 | 9 | 1 | [62]         |

## Description of characters and their respective states that were used for phylogenetic analyses

### **CHARACTER:** Cuticle surface

Refers to the presence of ornamentations in the cuticle.

#### **States:**

0 = Smooth at least in one sex

1 = With cuticular ornamentations at least in one sex

### **CHARACTER:** Cephalic outgrowth

Refers to the presence of apical outgrowth at cephalic end.

#### **States:**

0 = Present

1 = Absent

### **CHARACTER:** Number of outer circle cephalic papillae

Refers to the number of papillae of outer circle, at cephalic end.

#### **States:**

0 = 8 papillae in double pairs not fused at least in one sex

1 = 8 papillae in double pairs fused at least in one sex

2 = 8 papillae (still 4) close one another forming dorsal and ventral rows

### **CHARACTER:** Number of inner circle cephalic papillae

Refers to the number of papillae of inner circle, surrounding the oral opening at cephalic end, excluding the amphids.

#### **States:**

0 = 2 papillae single

1 = 4 papillae single

2 = > 4 papillae single (6 papillae)

### **CHARACTER:** Peribuccal ring of teeth

Refers to the presence of ring of teeth around the oral opening.

#### **States:**

0 = Absent

1 = Present

### **CHARACTER:** Esophageal teeth

Refers to the presence of teeth in the lobes of esophagus.

#### **States:**

0 = Absent

1 = Present

### **CHARACTER:** Esophagus structure

Refers to the morphology of esophagus, regarding presence or absence of anterior bulbous inflation.

#### **States:**

0 = Not swollen near oral opening in female

1 = With anterior bulbous inflation not separated from remaining part of oesophagus in female

2 = With anterior bulbous inflation well separated from remaining part of oesophagus in female, or with any specialization

### **CHARACTER:** Esophageal gland

Refers to the presence or absence of esophageal gland, including the morphology of this gland.

**States:**

0 = Absent

1 = Unicellular esophageal gland

2 = Multicellular esophageal gland (more than one nucleus)

**CHARACTER:** Ventriculus

Refers to the presence or absence of a well-developed ventriculus, between esophagus and intestine.

**States:**

0 = Absent

1 = Present

**CHARACTER:** Vulva

Refers to the presence or absence of functional vulva.

**States:**

0 = Absent

1 = Present

**CHARACTER:** Protusions on female tail

Refers to the presence of caudal projection on female tail, including the number of projections.

**States:**

0 = Absent

1 = 2 papilla-like protusions

2 = 4 papilla-like protusions

**CHARACTER:** Structure of gubernaculum distal end

Refers to the shape of the gubernaculum distal end, including the presence of ornamentations.

**States:**

0 = Absent

1 = Smooth (in a shape of spear lacking ornamentation and dorsal barbs)

2 = 1 dorsal barb on distal end

3 = Two dorsal barbs on distal end

4 = Distal end with lamellate-like structures (ornamentations)

5 = Transverse annulation on dorsal side present

6 = With dorsal protuberance

**CHARACTER:** Relative size of spicules

Refers to the relative size of spicules in male.

**States:**

0 = Equal

1 = Unequal

**CHARACTER:** Pair of far anterior precloacal papillae

Refers to the presence or absence of anterior precloacal papillae.

**States:**

0 = Absent

1 = Present

**CHARACTER:** Structure of male tail

Refers to the shape of male tail, regarding the presence and the morphology of caudal mound.

**States:**

0 = Absent

1 = Caudal mound unseparated in lobes

2 = Caudal mound separated in two lobes

3 = Caudal mound separated in more than two lobes

**CHARACTER:** Site of infection of gravid females

Refers to the tissue/organ, where the gravid females were found.

**States:**

0 = Fins

1 = Body cavity including connective tissues (e.g. mesentery)

2 = Subcutaneous tissue including superficial muscles

3 = Gonads

4 = Swimbladder

5 = Head tissues

6 = Circulatory system

7 = Musculature of body

8 = Stomach wall

**CHARACTER:** Habitat

Refers to the type of environment that in which parasite host inhabits.

**States:**

0 = Marine

1 = Freshwater

**CHARACTER:** Host Order

Refers to the order or (*misc.*) of fish host.

**States:**

0 = Cypriniformes

1 = Siluriformes

3 = Characiformes

4 = Tetraodontiformes

5 = Osteoglossiformes

6 = Esociformes

7 = Mugiliformes

8 = Belontiiformes

9 = Salmoniformes

A = Scombriformes

B = Eupercaria

C = Acropomatiformes

D = Carangaria

E = Perciformes

F = Cupleiformes

G = Gobiiformes

H = Carangiformes

**CHARACTER:** Geographic Origin

Refers to biogeographic occurrence of species.

**States:**

0 = Neotropical

1 = Palaearctic

2 = Afro-Tropical

4 = Tropical Indo-Pacific

5 = Temperate Northern Atlantic

6 = Temperate Northern Pacific

7 = Temperate Australasia

8 = Tropical Atlantic

**References cited in the matrix**

1. Moravec, F.; Charo-Karisa, H.; Jirků, M. Philometrids (Nematoda: Philometridae) from fishes of Lake Turkana, Kenya, including two new species of *Philometra* and erection of *Afrophilometra* gen. n. *Folia Parasitol* **2009**, 56, 41–54.
2. Moravec, F.; Scholz, T.; Dyková, I.; Kuchta, R.; Fiala, I.; Kohn, A. Redescription of *Alinema amazonicum* (Travassos, 1960) n. comb., a philometrid nematode with unusual morphology. *J. Parasitol* **2006**, 92, 138–144.
3. Moravec, F.; Scholz, T.; Kuchta, R.; Dyková, I.; Posel, P. New data on the morphology of *Nilonema senticosum* (Nematoda, Philometridae), a parasite of *Arapaima gigas* (Pisces), with notes on another philometrid, *Alinema amazonicum*, in Peru. *Acta Parasitol* **2006**, 51, 279–285.
4. Moravec, F.; Montoya-Mendoza, J.; Salgado-Maldonado, G. A new genus and species of philometrids (Nematoda) from the subcutaneous tissue of the crevalle jack, *Caranx hippos* (Osteichthyes), from the southern Gulf of Mexico. *J. Parasitol* **2008**, 94, 1346–1350.
5. Moravec, F.; Bakenhaster, M.D. New observations on philometrid nematodes (Philometridae) in marine fishes from the northern Gulf of Mexico and the Indian River Lagoon of Florida (USA), with first description of the male of *Caranginema americanum*. *J. Parasitol* **2012**, 98, 398–403.
6. Moravec, F.; de Buron, I. Two new species of philometrids (Nematoda: Philometridae) from marine fishes off South Carolina. *J. Parasitol* **2009**, 95, 722–727.
7. Moravec, F.; Barton, D.P. New records of philometrids (Nematoda: Philometridae) from marine fishes off Australia, including description of four new species and erection of *Digitiphilometroides* gen. n. *Folia Parasitol* **2018**, 65, 005.
8. Santos, C. P.; Moravec, F. Tissue-dwelling philometrid nematodes of the fish *Arapaima gigas* in Brazil. *J. Helminthol* **2009**, 83, 295–301.
9. Khalil, L.F. On a new philometrid nematode, *Thwaitia bagri* sp. nov., from a freshwater fish in the Sudan. *J. Helminthol* **1965**, 39, 309–312.
10. Moravec, F.; Bakenhaster, M. Philometrid nematodes infecting fishes from the Everglades National Park, Florida, USA, with description of two new species. *Folia Parasitol* **2010**, 57, 213.
11. Creplin, F.C. Observations de entozoïs. Pars I. Gryphiswaldiae, 1825; 86 pp.
12. Molnár, K. Life-history of *Philometra ovata* (Zeder, 1803) and *Ph. rischta* Skrjabin, 1917. *Acta Vet. Acad. Sci. Hung* **1966**, 16, 227–242.
13. Moravec, F. Development of the nematode *Philometra ovata* (Zeder, 1803) in the copepod intermediate host. *Folia Parasitol* **1980**, 27, 29–37.
14. Moravec, F. Occurrence of endohelminths in three species of cyprinids (*Abramis brama*, *Rutilus rutilus* and *Scardinius erythrophthalmus*) of the Mácha Lake fishpond system, Czechoslovakia. *Acta Soc. Zool. Bohemoslov* **1986**, 50, 49–69.
15. Moravec, F.; Bakenhaster, M. A new species of *Philometra* (Nematoda: Philometridae) from the sand perch *Diplectrum formosum* (Serranidae) off Florida, northern Gulf of Mexico. *J. Parasitol* **2010**, 96, 987–992.
16. Moravec, F.; Fajer-Avila, E. J.; Bakenhaster, M. *Philometra floridensis* sp. n. (Nematoda: Philometridae) from the ovary of red drum *Sciaenops ocellatus* (Osteichthyes: Sciaenidae) off the coast of Florida, USA. *J. Helminthol* **2010**, 84, 49–54.

17. Moravec, F.; Tedesco, P. Redescription of *Philometra globiceps* (Rudolphi, 1819) (Nematoda: Philometridae), the type species of *Philometra* Costa, 1845, including the first data obtained by SEM. *Parasitol. Res.* **2015**, *114*, 4413–4420.
18. Moravec, F.; Barton, D. P. New tissue-dwelling species of *Philometra* Costa, 1845 and *Philometroides* Yamaguti, 1935 (Nematoda: Philometridae) from marine perciform fishes off the northern coast of Australia. *Syst. parasitol.* **2016**, *93*, 623–637.
19. Moravec, F.; Lorber, J.; Konečný, R. Two new species of parasitic nematodes from the dogtooth tuna *Gymnosarda unicolor* (Pisces) off the Maldives Islands. *J. Parasitol.* **2007**, *93*, 171–178.
20. Moravec, F.; Ali, A.H.; Abed, J.M.; Shaker, S.J. New records of philometrids (Nematoda: Philometridae) from marine fishes off Iraq, with the erection of two new species and the first description of the male of *Philometroides eleutheronemae* Moravec & Manoharan, 2013. *Syst. Parasitol.* **2016**, *93*, 129–144.
21. Molnár, K. Host-parasite relationship between fish nematodes (genus *Thwaitia*) and their hosts. *Acta Vet. Acad. Sci. Hungar* **1969**, *19*, 427–433.
22. Molnár, K. Morphology and development of *Thwaitia kotlani* sp. n. (Philometridae, Nematoda). *Acta Vet. Acad. Sci. Hung* **1969**, *19*, 137–143.
23. Moravec, F. Nematodes of fishes in Czechoslovakia. *Acta Sc. Nat. Brno* **1971**, *5*, 1–49.
24. Grabda-Kazubaska, B.; Pilecka-Rapacz, M. Parasites of *Leuciscus idus* (L.), *Aspius aspius* (L.) and *Barbus barbus* (L.) from the river Vistula near Warszawa. *Acta Parasitol. Polon.* **1987**, *31*, 219–230.
25. Sterud, E.; Appleby, C. Parasites of common asp (*Aspius aspius*), bream (*Abramis brama*) and zander (*Stizostedion lucioperca*) from the river Nitelva, south-eastern Norway. *Bull. Scand. Soc. Parasitol.* **1996**, *6*, 134–138.
26. Moravec, F.; Gelnar, M.; Ergens, R.; Scholz, T. Metazoan parasites of fishes from the section of the Vltava River supposed to be affected by the operation of the Temelín nuclear electric powerstation, Czech Republic. *Acta Soc. Zool. Bohemoslov.* **1997**, *61*, 65–76.
27. Sokolov, S.G. Dracunculoid nematodes (Spirurida: Dracunculoidea) of fishes of the Volga River delta. *Parazitologiya* **2006**, *40*, 355–362.
28. Moravec, F.; Justine, J.-L. Some philometrid nematodes (Philometridae), including four new species of *Philometra*, from marine fishes off New Caledonia. *Acta Parasitol.* **2008**, *53*, 369–381.
29. Wang, S. X.; Li, L.; Zhang, L. P. Redescription and genetic characterization of *Philometra lagocephali* Moravec et Justine 2008 (Nematoda: Philometridae) from *Lagocephalus lunaris* (Bloch and Schneider) (Tetraodontiformes: Tetraodontidae) in the South China Sea. *Acta. Parasitol.* **2015**, *60*, 395–406.
30. Quiazon, K. M. A.; Yoshinaga, T., & Ogawa, K. Taxonomical study into two new species of *Philometra* (Nematoda: Philometridae) previously identified as *Philometra lateolabracis* (Yamaguti, 1935). *Folia Parasitol.* **2008**, *55*, 29–41.
31. Moravec, F.; Barton, D. P.; Shamsi, S. *Philometra longa* n. sp. (Nematoda: Philometridae), a new parasite from the abdominal cavity of the eastern sea garfish *Hyporhamphus australis* (Hemiramphidae, Belontiiformes) off Australia. *Syst. Parasitol.* **2021**, *98*, 167–175.
32. Moravec, F.; Nagasawa, K.; Nitta, M.; Tawa, A. New records of philometrids (Nematoda: Philometridae) from marine fishes off Japan, including description of *Philometra kidakoi* sp. n. and *Congerinema japonicum* gen. et sp. n. *Folia Parasitol.* **2019**, *66*, 021.
33. Moravec, F.; Bakenhaster, M.; Fajer-Avila, E. New philometrids (Nematoda, Philometridae) from head tissues of two serranid fishes (*Epinephelus morio* and *Mycteroperca microlepis*) off Florida, northern Gulf of Mexico. *Acta Parasitol.* **2010**, *55*, 359–368.
34. Cárdenas, M. Q.; Moravec, F.; Fernandes, B. M.; Morais, A. M. A new species of *Philometra* Costa, 1845 (Nematoda: Philometridae) from the freshwater fish (red piranha) *Pygocentrus nattereri* Kner (Characidae) in Amazonia, Brazil. *Syst. Parasitol.* **2012**, *83*, 137–144.
35. Quiazon, K. M. A.; Yoshinaga, T.; Ogawa, K. *Philometra sawara* sp. n. and a redescription of *Philometra sciaenae* Yamaguti, 1941 and *Philometra nemipteri* Luo, 2001 (Nematoda: Philometridae): a morphological and molecular approach. *Folia Parasitol.* **2008**, *55*, 277.
36. Moravec, F. Redescription of the nematode *Philometra obturans* (Prenant, 1886) with a key to the philometrid nematodes parasitic in European freshwater fishes. *Folia Parasitol.* **1978**, *25*, 115–124.
37. Molnár, K. Beiträge zur Kenntnis der Fischparasiten Ungarns VI. Cestoda, Nematoda, Acanthocephala, Hirudinea. *Parasitol. Hungar.* **1970**, *3*, 51–76.
38. Knopf, K.; Hölker, F. First report of *Philometra obturans* (Nematoda) and *Neoergasilus japonicus* (Copepoda) in Germany. *Acta Parasitol* **2005**, *50*, 261–262.



39. Moravec, F.; Justine, J.-L. Two species of *Philometra* (Nematoda, Philometridae) from serranid fishes off New Caledonia. *Acta Parasitol.* **2005**, *50*, 323–331.
40. Moravec, F.; Justine, J. L. New data on dracunculoid nematodes from fishes off New Caledonia, including four new species of *Philometra* (Philometridae) and *Ichthyofilaria* (Guyanemidae). *Folia Parasitol.* **2009**, *56*, 129.
41. Moravec, F.; Ogawa, K.; Suzuki, M.; Miyazaki, K.; Donai, H. On two species of *Philometra* (Nematoda, Philometridae) from the serranid fish *Epinephelus septemfasciatus* in Japan. *Acta Parasitol.* **2002**, *47*, 34–40.
42. Rückert, S.; Klimpel, S.; Al-Quraishy, S.; Mehlhorn, H.; Palm, H.W. Transmission of fish parasites into grouper mariculture (Serranidae: *Epinephelus coioides* (Hamilton, 1822)) in Lampung Bay, Indonesia. *Parasitol. Res.* **2009**, *104*, 523–532.
43. Neubert, K.; Yulianto, I.; Kleinertz, S.; Theisen, S.; Wiryawan, B.; Palm, H.W. Parasite fauna of white-streaked grouper, *Epinephelus ongus* (Bloch, 1790) (Epinephelidae) from Karimunjawa, Indonesia. *Parasitol.* **2016**, *2*, e12.
44. Dewi, K.; Palm, H.W. Philometrid nematodes (Philometridae) of marine teleosts from Balinese waters, Indonesia, including the description of *Philometra damriyasai* sp. nov. *Zootaxa* **2017**, *4341*, 577–584.
45. Molnár, K. Morphology and development of *Philometra abdominalis* Nybelin, 1928. *Acta Vet. Acad. Sci. Hung.* **1967**, *17*, 293–300.
46. Moravec, F. The morphology and systematic status of *Philometra ovata* (Zeder, 1803) (Nematoda: Philometridae). *Folia Parasitol.* **1986**, *33*, 227–233.
47. Moravec, F. The systematic status of *Philometra abdominalis* Nybelin, 1928 (Nematoda: Philometridae) [= a junior synonym of *P. ovata* (Zeder, 1803)]. *Folia Parasitol* **2004**, *51*, 75–76.
48. Iwaki, T.; Tamai, K.; Ogimoto, K.; Iwahashi, Y.; Waki, T.; Kawano, F.; Ogawa, K. New records of *Philometra pellucida* (Jägerskiöld, 1893) (Nematoda: Philometridae) from the body cavity of *Arothron mappa* (Lesson) and *Arothron nigropunctatus* (Bloch et Schneider) reared in aquariums, with synonymisation of *Philometra robusta* Moravec, Möller et Heeger, 1992. *Folia Parasitol.* **2020**, *67*, 025.
49. Moravec, F.; Cutmore, S. C.; Yong, R. Q. Y. Redescription of *Philometra pellucida* (Jägerskiöld, 1893) (Nematoda: Philometridae) parasitic in the abdominal cavity of the blackspotted puffer *Arothron nigropunctatus* (Bloch & Schneider) (Teleostei: Tetraodontidae) off Australia and Japan. *Syst. Parasitol.* **2018**, *95*, 665–671.
50. Moravec, F.; Möller, H.; Heeger, T. *Philometra robusta* sp. n. (Nematoda: Philometridae) from the abdominal cavity of the scribbled toadfish, *Arothron mappa* (Lesson) from the Philippines. *Folia Parasitol.* **1992**, *39*, 227–234.
51. Moravec, F.; Chaabane, A.; Neifar, L.; Gey, D.; Justine, J. L. Species of *Philometra* (Nematoda, Philometridae) from fishes off the Mediterranean coast of Africa, with a description of *Philometra rara* n. sp. from *Hyporthodus haifensis* and a molecular analysis of *Philometra saltatrix* from *Pomatomus saltatrix*. *Parasite* **2017**, *24*.
52. Mishra, T.N.; Chubb, J.C. The parasite fauna of the fish of the Shropshire Canal, Cheshire. *J. Zool., Lond.* **1969**, *1577*, 213–224.
53. Moravec, F.; Magi, M.; Macchioni, F. Redescription of the gonad-infecting nematode *Philometra saltatrix* Ramachandran, 1973 (Philometridae) based on specimens from the type host *Pomatomus saltatrix* (L.) (Osteichthyes) from the Tuscan Sea, Italy. *Folia Parasitol.* **2008**, *55*, 219–223.
54. Moravec, F.; Genç, E. Redescription of three *Philometra* spp. (Nematoda, Philometridae) from the gonads of marine perciform fishes of Iskenderun Bay (North-East Mediterranean), Turkey. *Acta Parasitol.* **2004**, *49*, 31–40.
55. Clarke, L.M.; Dove, A.D.M.; Conover, D.O. Prevalence, intensity, and effect of a nematode (*Philometra saltatrix*) in the ovaries of bluefish (*Pomatomus saltatrix*). *Fish. Bull.* **2006**, *104*, 118–124.
56. Sokolov, S.G. Redescription of the parasitic nematode *Philometroides moravecii* (Dracunculoidea, Philometridae). *Zool. Zhur.* **2013**, *92*, 866–872.
57. Sokolov, S.G.; Frolov, E.V. Heterogeneity of the parasites of the Chinese sleeper (*Percottus glenii*, Osteichthyes, Odontobutidae) within its natural area. *Zool. Zhur.* **2012**, *91*, 17–29.
58. Moravec, F. Parasitic nematodes of freshwater fishes of Europe. Academia and Kluwer Academic Publishers, Prague and Dordrecht, Boston, London, 1994, 473 pp.
59. Rasheed S. A revision of the genus *Philometra* Costa, 1845. *J. Helminthol.* **1963**, *37*, 89–130.
60. Moravec F., Ogawa K. 2019: Description of two new species of *Philometra* Costa, 1845 (Nematoda: Philometridae) from marine fishes off Japan, with notes on *Philometroides seriola* (Yamaguti, 1935). *Acta Parasitol.* **2019**, *64*, 829–838.
61. Choe, S.; Eom, K. S. Morphological and Molecular Characterization of *Philometroides seriola* from Japanese Amberjack *Seriola quinqueradiata* caught in East Sea, Republic of Korea. *Korean J. Parasitol.*, **2022**, *60*, 45.

62. Moravec, F.; Nagasawa, K. New data on the morphology of *Philonema oncorhynchi* Kuitunen-Ekbaum, 1933 (Nematoda: Dracunculoidea) from the abdominal cavity of Pacific salmon (*Oncorhynchus* spp.). *Syst. Parasitol.* **1999**, 43, 67–74.

**Table S1.** Species of fish hosts used in the cophylogenetic analysis, associated with their order (or *misc*), family and GenBank accession numbers.

| Host species                       | Order (or <i>misc</i> ) | Family          | <i>cox1</i> mtDNA |
|------------------------------------|-------------------------|-----------------|-------------------|
| <i>Arapaima gigas</i>              | Osteoglossiformes       | Osteoglossidae  | NC010570*         |
| <i>Arothron stellatus</i>          | Tetraodontiformes       | Tetraodontidae  | NC056962*         |
| <i>Bagrus bajad</i>                | Siluriformes            | Bagridae        | LC487110          |
| <i>Calophrysus macropterus</i>     | Siluriformes            | Pimelodidae     | KT952410          |
| <i>Carassius gibelio</i>           | Cypriniformes           | Cyprinidae      | NC014177*         |
| <i>Caranx hippos</i>               | Carangiformes           | Carangidae      | FJ347905          |
| <i>Diplectrum formosum</i>         | Perciformes             | Serranidae      | JN312338          |
| <i>Epinephelus morio</i>           | Perciformes             | Serranidae      | KF836470          |
| <i>Epinephelus septemfasciatus</i> | Perciformes             | Serranidae      | HM593054          |
| <i>Esox lucius</i>                 | Esocidae                | Esociformes     | NC004593*         |
| <i>Gobio gobio</i>                 | Cypriniformes           | Gobionidae      | NC008662*         |
| <i>Gymnosarda unicolor</i>         | Scombriformes           | Scombridae      | AP012510*         |
| <i>Hydrocynus forskahlii</i>       | Characiformes           | Alestidae       | JF800983          |
| <i>Hyporhamphus australis</i>      | Beloniformes            | Hemiramphidae   | KX781932          |
| <i>Hyporthodus haifensis</i>       | Perciformes             | Epinephelidae   | KT023567          |
| <i>Lagocephalus sceleratus</i>     | Tetraodontiformes       | Tetraodontidae  | JQ681800          |
| <i>Lateolabrax japonicus</i>       | Acropomatiformes        | Lateolabracidae | HM180646          |
| <i>Lates niloticus</i>             | Carangaria              | Latidae         | DQ108015          |
| <i>Leuciscus aspius</i>            | Cypriniformes           | Leuciscidae     | HM392013          |
| <i>Lutjanus johnii</i>             | Eupercaria              | Lutjanidae      | EU148537          |
| <i>Lutjanus griseus</i>            | Eupercaria              | Lutjanidae      | GU224916          |
| <i>Lutjanus sebae</i>              | Eupercaria              | Lutjanidae      | EU600104          |
| <i>Nemipetrus virgatus</i>         | Eupercaria              | Nemipteridae    | FJ237833          |
| <i>Oncorhynchus nerkae</i>         | Salmoniformes           | Salmonidae      | MK216599          |
| <i>Pagrus major</i>                | Eupercaria              | Sparidae        | FJ237863          |
| <i>Pennahia argentina</i>          | Eupercaria              | Sciaenidae      | AB547245          |
| <i>Percottus glenii</i>            | Gobiiformes             | Odontobutidae   | KX224108          |
| <i>Planiliza klunzingeri</i>       | Mugiliformes            | Mugilidae       | MT943741          |
| <i>Pomatomus saltatrix</i>         | Scombriformes           | Pomatomidae     | AB355904*         |
| <i>Protonibea diacanthus</i>       | Eupercaria              | Sciaenidae      | DQ107820          |
| <i>Pseudaspius leptocephalus</i>   | Cypriniformes           | Leuciscidae     | LC277264          |
| <i>Pygocentrus nattereri</i>       | Characiformes           | Serrasalminidae | KU288904          |
| <i>Rachycentron canadum</i>        | Carangiformes           | Rachycentridae  | EF609583          |
| <i>Rutilus rutilus</i>             | Cypriniformes           | Leuciscidae     | ON097817          |
| <i>Sciaenops ocellatus</i>         | Eupercaria              | Sciaenidae      | EU752180          |
| <i>Seriola quinqueradiata</i>      | Carangiformes           | Carangidae      | MK560632          |
| <i>Uranoscopus scaber</i>          | Perciformes             | Uranoscopidae   | KM538637          |

\*Sequences retrieved from whole mitochondrial genome.

**Table S2.** Correspondence between abbreviations and species names from fish hosts and philometrid parasites, used in the cophylogenetic analysis (see Figure 3A of the manuscript).

| Abbreviation | Host species                       | Abbreviation | Parasite species                       |
|--------------|------------------------------------|--------------|----------------------------------------|
| Arag         | <i>Arapaima gigas</i>              | Afrh         | <i>Afrotylometra hydrocyoni</i>        |
| Aros         | <i>Arothron stellatus</i>          | Alina        | <i>Alinema amazonicum</i>              |
| Bagb         | <i>Bagrus bajad</i>                | Cara         | <i>Caranginema americanum</i>          |
| Calom        | <i>Calophrys macropterus</i>       | Digm         | <i>Digitipilometroides marinus</i>     |
| Carag        | <i>Carassius gibelio</i>           | Nils         | <i>Nilonema senticosum</i>             |
| Carh         | <i>Caranx hippos</i>               | Phidg        | <i>Philometroides grandipapillatus</i> |
| Dipf         | <i>Diplectrum formosum</i>         | Phidm        | <i>Philometroides moravecii</i>        |
| Epim         | <i>Epinephelus morio</i>           | Phids        | <i>Philometroides sanguineus</i>       |
| Epis         | <i>Epinephelus septemfasciatus</i> | Phidse       | <i>Philometroides seriola</i>          |
| Esol         | <i>Esox lucius</i>                 | Phidst       | <i>Philometroides stomachicus</i>      |
| Gobg         | <i>Gobio gobio</i>                 | Phila        | <i>Philometra arafurensis</i>          |
| Gymu         | <i>Gymnosarda unicolor</i>         | Philba       | <i>Philometra bagri</i>                |
| Hydf         | <i>Hydrocynus forskahlii</i>       | Philbr       | <i>Philometra brevispicula</i>         |
| Hypa         | <i>Hyporhamphus australis</i>      | Phile        | <i>Philometra cyprinirutili</i>        |
| Hypoh        | <i>Hyporthodus haifensis</i>       | Phild        | <i>Philometra diplectri</i>            |
| Lags         | <i>Lagocephalus sceleratus</i>     | Philf        | <i>Philometra floridensis</i>          |
| Latj         | <i>Lateolabrax japonicus</i>       | Philgl       | <i>Philometra globiceps</i>            |
| Latn         | <i>Lates niloticus</i>             | Philgr       | <i>Philometra gracilis</i>             |
| Leua         | <i>Leuciscus aspius</i>            | Philgy       | <i>Philometra gymnosardae</i>          |
| Lutj         | <i>Lutjanus johnii</i>             | Phili        | <i>Philometra iraqiensis</i>           |
| Lutjg        | <i>Lutjanus griseus</i>            | Philk        | <i>Philometra kotlani</i>              |
| Luts         | <i>Lutjanus sebae</i>              | Phillate     | <i>Philometra lateolabracis</i>        |
| Nemv         | <i>Nemipetrus virgatus</i>         | Phillati     | <i>Philometra lati</i>                 |
| Oncn         | <i>Oncorhynchus nerkae</i>         | Phillg       | <i>Philometra lagocephali</i>          |
| Pagm         | <i>Pagrus major</i>                | Phillo       | <i>Philometra longa</i>                |
| Pena         | <i>Pennahia argentina</i>          | Philma       | <i>Philometra madai</i>                |
| Perg         | <i>Percottus glenii</i>            | Philmo       | <i>Philometra morri</i>                |
| Plak         | <i>Planiliza klunzingeri</i>       | Philna       | <i>Philometra nattereri</i>            |
| Poms         | <i>Pomatomus saltatrix</i>         | Philne       | <i>Philometra nemipteri</i>            |
| Prod         | <i>Protonibea diacanthus</i>       | Philob       | <i>Philometra obturans</i>             |
| Psel         | <i>Pseudaspius leptocephalus</i>   | Philoc       | <i>Philometra oculares</i>             |
| Pygn         | <i>Pygocentrus nattereri</i>       | Philoon      | <i>Philomena oncorhynchi</i>           |
| Racc         | <i>Rachycentron canadum</i>        | Philov       | <i>Philometra ovata</i>                |
| Rutr         | <i>Rutilus rutilus</i>             | Philp        | <i>Philometra pellucida</i>            |
| Scio         | <i>Sciaenops ocellatus</i>         | Philra       | <i>Philometra rara</i>                 |
| Serq         | <i>Seriola quinqueradiata</i>      | Philri       | <i>Philometra rischta</i>              |
| Uras         | <i>Uranoscopus scaber</i>          | Philsa       | <i>Philometra saltatrix</i>            |
|              |                                    | Philsc       | <i>Philometra sciaenae</i>             |
|              |                                    | Philsp       | <i>Philometra spiriformis</i>          |
|              |                                    | Rumar        | <i>Rumai rumai</i>                     |
